# Supplementary material for: Species abundance correlations carry limited information about microbial network interactions
Source: PubMed Central journal article supplement (PMC9518925; doi:10.1371/journal.pcbi.1010491), 2022-09-09
Supplement: pcbi.1010491.s008.pdf [file pcbi.1010491.s008.pdf]

**S2 Table. Mann-Whitney U test results for the F1-scores of the samples taken outside equilibrium relative to those taken at equilibrium ( $t_5$  in Fig 5) and for the F1-scores of the samples taken outside equilibrium. The significant values are indicated in bold.**

| <i>Variation in interactions</i>        |                           |
|-----------------------------------------|---------------------------|
| <b>Timepoint</b>                        | <b>p-value</b>            |
| Random                                  | <b>p-value &lt; 0.001</b> |
| $t_1$                                   | <b>p-value &lt; 0.001</b> |
| $t_2$                                   | <b>p-value &lt; 0.001</b> |
| $t_3$                                   | <b>p-value &lt; 0.001</b> |
| $t_4$                                   | <b>p-value &lt; 0.001</b> |
| <i>Variation in carrying capacities</i> |                           |
| <b>Timepoint</b>                        | <b>p-value</b>            |
| Random                                  | p-value > 0.05            |
| $t_1$                                   | <b>p-value &lt; 0.001</b> |
| $t_2$                                   | <b>p-value &lt; 0.001</b> |
| $t_3$                                   | <b>p-value &lt; 0.001</b> |
| $t_4$                                   | <b>p-value &lt; 0.001</b> |
| <i>Variation in growth rates</i>        |                           |
| <b>Timepoint</b>                        | <b>p-value</b>            |
| Random                                  | <b>p-value &lt; 0.001</b> |
| $t_1$                                   | <b>p-value &lt; 0.001</b> |
| $t_2$                                   | <b>p-value &lt; 0.001</b> |
| $t_3$                                   | <b>p-value &lt; 0.001</b> |
| $t_4$                                   | <b>p-value &lt; 0.001</b> |
